# Supplementary material
Source: Springer Nature journal article supplement (https://springermedizin.de/resource/supplementary/13063_2010_629_MOESM1_ESM.pdf/9618902)

Number of trials

15  
10  
5  
0

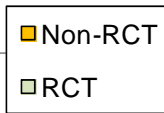

1986

1990

1994

1998

2002

2006

Starting year

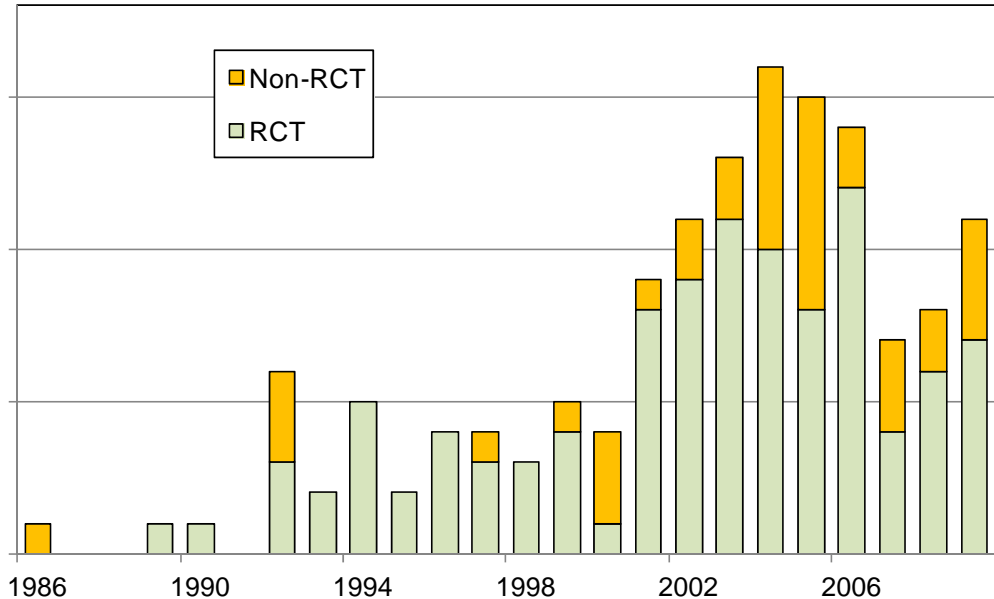

Supplement: MOESM1 [file 9618902]
